# Supplementary material
Source: MDPI journal article supplement (https://www.mdpi.com/2674-0516/2/2/18)
Supplement: s1 [file s1 › powders-2125042-supplementary.pdf]

Article

# Acoustic Sensing and Supervised Machine Learning for In Situ Classification of Semi-Autogenous (SAG) Mill Feed Size Fractions Using Different Feature Extraction Techniques

Kwaku Boateng Owusu <sup>1,\*</sup>, William Skinner <sup>1,2</sup> and Richmond K. Asamoah <sup>1,2,\*</sup>

<sup>1</sup> Future Industries Institute, STEM, University of South Australia, Mawson Lakes, SA 5095, Australia; william.skinner@unisa.edu.au

<sup>2</sup> ARC Centre of Excellence for Enabling Eco-Beneficiation of Minerals, Future Industries Institute, STEM, University of South Australia, Mawson Lakes, SA 5095, Australia

\* Correspondence: kwaku\_boateng.owusu@mymail.unisa.edu.au (K.B.O.); richmond.asamoah@unisa.edu.au (R.K.A.)

## A1. Elemental and mineralogical studies

Using the XRF and XRD analysis, both elemental and mineralogical studies of the rock material are provided in Table S1.

**Table S1.** Elemental and Mineralogical Analysis.

| Element  | Fe        | Si       | Mg       | Ca       | Al     | P        | Mn         | LE    |
|----------|-----------|----------|----------|----------|--------|----------|------------|-------|
| % Wt.    | 45.23     | 10.37    | 8.10     | 3.82     | 2.34   | 0.10     | 0.39       | 29.55 |
| Minerals | Magnetite | Hematite | Goethite | Pyroxene | Quartz | Chlorite | Carbonates |       |
| % Mass   | 37.95     | 5.39     | 16.06    | 5.24     | 6.81   | 6.52     | 14.00      |       |

Note: LE is light elements.

## A2. Image of feed size fractions

Figure S1. shows the photograph of feed size fractions used for the study.

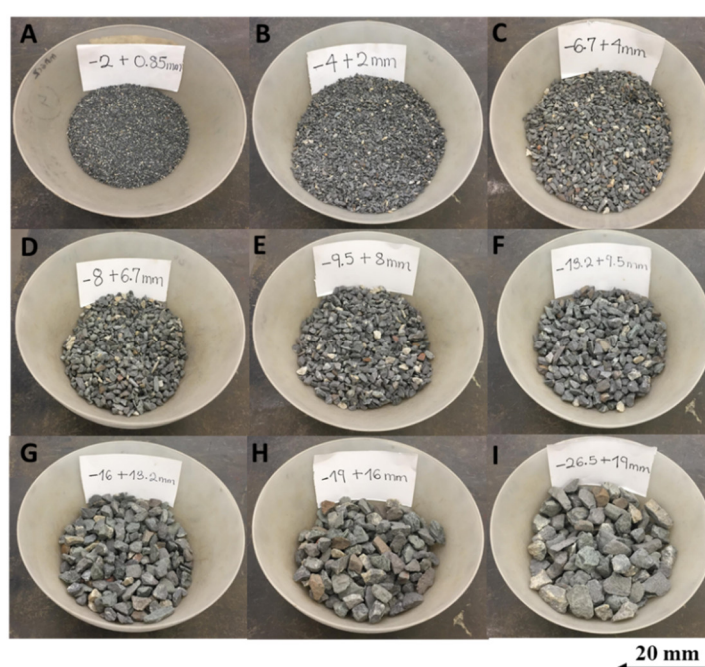

**Figure S1.** Classes of rock feed particle sizes.

### A3. Sensor specifications

**Table S2.** The specifications of the sensor used for the investigation.

| Specifications                 | AudioBox iOne: PreSonus          |
|--------------------------------|----------------------------------|
| Frequency response             | 10 Hz to 40 kHz ( $\pm 3.0$ dB)  |
| Maximum bit depth /sample rate | 24-bit/96 kHz                    |
| Microphone type                | -                                |
| Pre-amp                        | Class A microphone pre-amplifier |
| Sampling time                  | 1 second                         |

### A4. Mill specification and experimental conditions

**Table S3.** The detailed mill specifications, feed properties, and experimental conditions.

| Mill Specifications                               |                             |
|---------------------------------------------------|-----------------------------|
| Mill type                                         | Lab-based AG/SAG mill       |
| Mill diameter (mm)                                | 300                         |
| Mill length (mm)                                  | 150                         |
| Number of lifters                                 | 6                           |
| Mill volume with lifters( $\text{cm}^3$ )         | 10341.9                     |
| Mill volume without lifters ( $\text{cm}^3$ )     | 10602.9                     |
| Mill critical speed, $N_c$ (rpm)                  | 77.5                        |
| Mill speed                                        | Variable                    |
| Input Feed Material Properties                    |                             |
| Rock specific gravity (SG)                        | 3.460                       |
| Ball specific density ( $\text{kg}/\text{m}^3$ )  | 7890                        |
| Water specific density ( $\text{kg}/\text{m}^3$ ) | 1000                        |
| Ball quality                                      | Alloy steel                 |
| Experimental Grinding Conditions                  |                             |
| Operational mill speed (%)                        | 75 critical speed ( $N_c$ ) |
| Mill filling volume fraction, $J_b$ (%)           | 18                          |
| Rock loading fraction, $J_r$ (%)                  | 10                          |
| Ball loading (%)                                  | 8                           |
| Water volume (ml)                                 | 857                         |
| Pulp density (%)                                  | 70                          |
| Porosity/voidage, $\varepsilon$ (%)               | 40                          |
| Grind time (minutes)                              | 5                           |

The mill filling volume, which includes the ball and rock filling fraction, is deduced from the expressions shown in Eq. 1-3 [1, 2]. Due to limited rock material mass, the total mill volume was scaled down to about 18 % mill volume against 26 % of the proposed optimum condition by [3].

$$\text{Ball filling fraction, } J_b = \frac{\text{Mass of balls} / \text{Density of balls}}{\text{Mill volume}} \times \frac{1}{1-\varepsilon} \quad (1)$$

$$\text{Rock filling fraction, } J_r = \frac{\text{Mass of rock} / \text{Density of rock}}{\text{Mill volume}} \times \frac{1}{1-\varepsilon} \quad (2)$$

$$\text{Total mill filling fraction, } J_t = \frac{\text{Volume of balls and rock}}{\text{Mill volume}} \times \frac{1}{1-\varepsilon} = J_b + J_r \quad (3)$$

## A5. Characterisation techniques

### A5.1 Particle size distribution

After each grinding test, the mill charge was emptied into a bucket, followed by steel ball removals. The discharge slurry was subjected to pressure filtration, and the residue was sent to an electric oven (50 °C) to obtain a dry product sample. Using the Jones–Riffle splitter, the product material was uniformly divided, and the sample was taken for sieve analysis following the Tyler series approach. For experimental reproducibility and accuracy, the sieve analysis was carried out two times. Figure S2 shows the product particle size distribution after grinding.

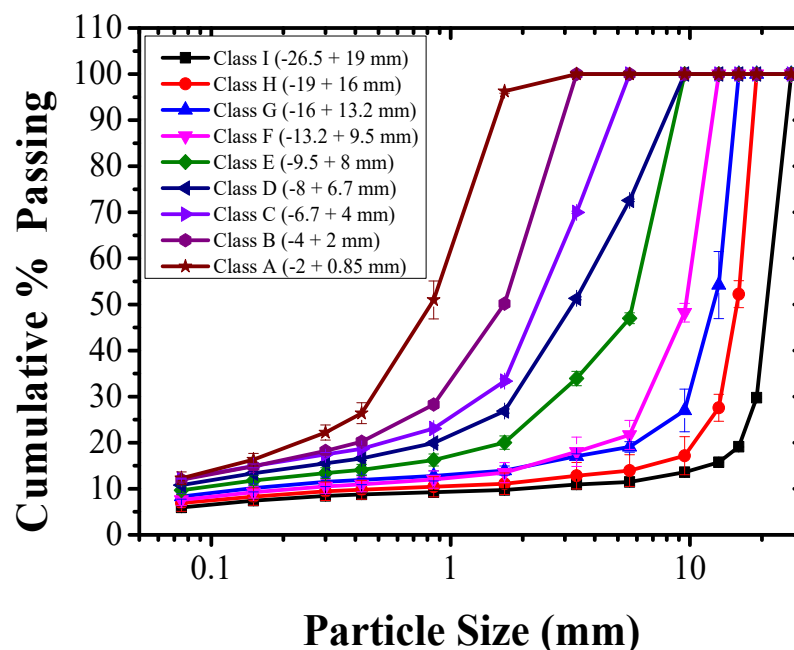

Figure S2. Product size distribution of different feed size fractions after grinding.

## A6. Mill acoustic emission processing

### A6.1 Time-domain signal

The time–amplitude domain signals of rock-only variations, and their combination with constant ball mass and water volume, are shown in Figure S3.

Rock–Ball–Water mixture

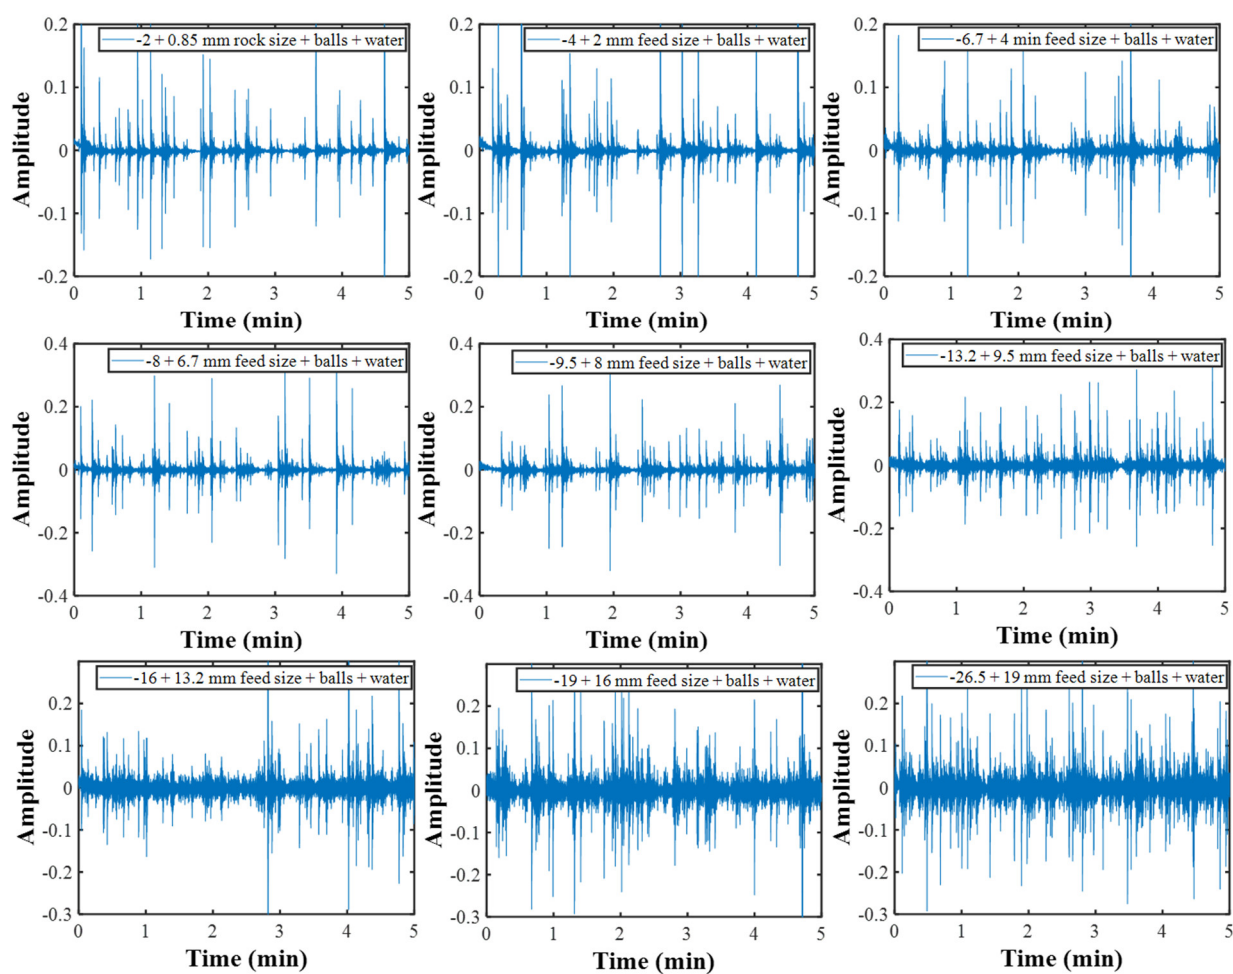

Figure S3. Time–amplitude domain signal representation.

## References

1. Deniz, V. A study on the effect of ball diameter on breakage properties of clinker and limestone. *Indian J. Chem. Technol.*, **2021**, *19*(3), 180–184.
2. Nava, J.V.; Llorens, T.; Menéndez-Aguado, J.M. Kinetics of Dry-Batch Grinding in a Laboratory-Scale Ball Mill of Sn–Ta–Nb Minerals from the Penouta Mine (Spain). *Metals* **2020**, *10*, 1687. <https://doi.org/10.3390/met10121687>.
3. Starkey, J.H.; Hindstrom, S.; Orser, T. Choosing a SAG mill to achieve design performance. In Proceedings of the CMP Conference, Ottawa, Canada, January 2023.
